# Supplementary material for: Experimental and theoretical insights into the synthesis of α-aminoalkyl naphthol derivatives catalyzed by a manganese complex immobilized on multi-walled carbon nanotubes
Source: Royal Society of Chemistry journal article supplement (doi:10.1039/c9dt03604k), 2019-01-01
Supplement: c9dt03604k1.pdf [file c9dt03604k1.pdf]

## Supporting information

### Experimental and theoretical insights into the synthesis of $\alpha$ -aminoalkyl naphthol derivatives catalyzed by manganese complex immobilized on multi-wall carbon nanotubes

Jamshid Rakhshshah\*<sup>a</sup> and Fereshteh Yaghoobi\*<sup>b</sup>

#### COORDINATES

##### R1

|   |              |              |              |
|---|--------------|--------------|--------------|
| C | 2.868667000  | 1.940363000  | 0.405459000  |
| C | 1.490673000  | 2.204023000  | -0.037710000 |
| C | 0.575158000  | 0.997067000  | -0.140942000 |
| C | 1.192933000  | -0.345360000 | -0.191019000 |
| C | 2.556781000  | -0.493100000 | 0.189983000  |
| C | 3.344369000  | 0.682153000  | 0.532905000  |
| C | 0.521564000  | -1.483259000 | -0.677303000 |
| C | 1.140424000  | -2.732445000 | -0.716255000 |
| C | 2.459946000  | -2.883182000 | -0.272916000 |
| C | 3.161339000  | -1.763504000 | 0.165460000  |
| C | -0.750333000 | 1.321242000  | -0.138984000 |
| O | 1.100855000  | 3.344955000  | -0.245252000 |
| C | -1.982412000 | 0.538048000  | 0.015242000  |
| C | -3.143174000 | 0.976027000  | -0.656916000 |
| C | -4.356561000 | 0.302198000  | -0.512274000 |
| C | -4.446936000 | -0.802030000 | 0.340366000  |
| C | -3.314438000 | -1.224875000 | 1.046729000  |
| C | -2.095734000 | -0.567617000 | 0.884529000  |
| H | 3.485287000  | 2.820380000  | 0.601248000  |
| H | 4.378299000  | 0.517230000  | 0.852739000  |
| H | -0.498957000 | -1.388397000 | -1.046172000 |
| H | 0.589149000  | -3.594122000 | -1.101077000 |
| H | 2.942196000  | -3.863414000 | -0.292179000 |
| H | 4.205154000  | -1.856894000 | 0.477803000  |
| H | -0.914678000 | 2.401928000  | -0.236392000 |
| H | -3.081963000 | 1.852821000  | -1.307174000 |
| H | -5.238493000 | 0.649139000  | -1.056608000 |
| H | -5.399120000 | -1.323562000 | 0.466134000  |
| H | -3.383908000 | -2.071606000 | 1.734474000  |
| H | -1.223408000 | -0.897654000 | 1.451122000  |

##### R2

|   |              |              |              |
|---|--------------|--------------|--------------|
| N | 2.312033000  | -0.000001000 | -0.051340000 |
| C | 0.938789000  | 0.000002000  | -0.007163000 |
| C | 0.196761000  | -1.199389000 | -0.003065000 |
| C | -1.195127000 | -1.135752000 | 0.002710000  |

|   |              |              |              |
|---|--------------|--------------|--------------|
| N | -1.900413000 | 0.000000000  | 0.005752000  |
| C | -1.195129000 | 1.135749000  | 0.002740000  |
| C | 0.196761000  | 1.199390000  | -0.003075000 |
| H | 0.704511000  | -2.167934000 | -0.006833000 |
| H | -1.772232000 | -2.069032000 | 0.006616000  |
| H | -1.772233000 | 2.069032000  | 0.006596000  |
| H | 0.704507000  | 2.167937000  | -0.006868000 |
| H | 2.800889000  | 0.854350000  | 0.183353000  |
| H | 2.800885000  | -0.854348000 | 0.183372000  |

**pre-TS**

|   |              |              |              |
|---|--------------|--------------|--------------|
| C | 1.335096000  | 3.152952000  | 0.455087000  |
| C | 0.568184000  | 2.001276000  | -0.032049000 |
| C | 1.313758000  | 0.691089000  | -0.126136000 |
| C | 2.789507000  | 0.739940000  | -0.185057000 |
| C | 3.458356000  | 1.929744000  | 0.219132000  |
| C | 2.680212000  | 3.099843000  | 0.591204000  |
| C | 3.571573000  | -0.308583000 | -0.704806000 |
| C | 4.962458000  | -0.221178000 | -0.754154000 |
| C | 5.618298000  | 0.924829000  | -0.286809000 |
| C | 4.863982000  | 1.994780000  | 0.185484000  |
| C | 0.501898000  | -0.409049000 | -0.087793000 |
| O | -0.631698000 | 2.112037000  | -0.283605000 |
| C | 0.730599000  | -1.843499000 | 0.104124000  |
| C | 1.777245000  | -2.386831000 | 0.880296000  |
| C | 1.877410000  | -3.763212000 | 1.073922000  |
| C | 0.945367000  | -4.631156000 | 0.491132000  |
| C | -0.109209000 | -4.108996000 | -0.263674000 |
| C | -0.227307000 | -2.729962000 | -0.436323000 |
| H | 0.762345000  | 4.058797000  | 0.665006000  |
| H | 3.229286000  | 3.981769000  | 0.936085000  |
| H | 3.083067000  | -1.201780000 | -1.093171000 |
| H | 5.539334000  | -1.052640000 | -1.166791000 |
| H | 6.708594000  | 0.988451000  | -0.314637000 |
| H | 5.358187000  | 2.912302000  | 0.516462000  |
| N | -2.896476000 | 0.479878000  | -1.329998000 |
| H | 2.500036000  | -1.722442000 | 1.355708000  |
| H | 2.686066000  | -4.164186000 | 1.690247000  |
| H | 1.032629000  | -5.710205000 | 0.641041000  |
| H | -0.853278000 | -4.777278000 | -0.704002000 |
| H | -1.071914000 | -2.317717000 | -0.994887000 |
| C | -4.072479000 | 0.530575000  | -0.619241000 |
| C | -4.137964000 | 1.150412000  | 0.647657000  |
| C | -5.342550000 | 1.137808000  | 1.345661000  |
| N | -6.472138000 | 0.572459000  | 0.901972000  |
| C | -6.408453000 | -0.009931000 | -0.299513000 |
| C | -5.262363000 | -0.061944000 | -1.091114000 |
| H | -3.253945000 | 1.639120000  | 1.064305000  |
| H | -5.394840000 | 1.621640000  | 2.329369000  |
| H | -7.333935000 | -0.471080000 | -0.667927000 |
| H | -5.287683000 | -0.558960000 | -2.065292000 |

|   |              |              |              |
|---|--------------|--------------|--------------|
| H | -2.148621000 | 1.122820000  | -1.065301000 |
| H | -0.560410000 | -0.160996000 | -0.183423000 |
| H | -2.962755000 | 0.276284000  | -2.319957000 |

### TS

|   |              |              |              |
|---|--------------|--------------|--------------|
| C | -2.548105000 | -2.932494000 | 0.091925000  |
| C | -1.288176000 | -2.251482000 | 0.283312000  |
| C | -1.269231000 | -0.801715000 | 0.260970000  |
| C | -2.512775000 | -0.063285000 | 0.085812000  |
| C | -3.724796000 | -0.802472000 | -0.141446000 |
| C | -3.695844000 | -2.236863000 | -0.134440000 |
| C | -2.652542000 | 1.347279000  | 0.209390000  |
| C | -3.872173000 | 1.984439000  | 0.040725000  |
| C | -5.039736000 | 1.252500000  | -0.246889000 |
| C | -4.955696000 | -0.125847000 | -0.319261000 |
| C | 0.057426000  | -0.260465000 | 0.494396000  |
| O | -0.208775000 | -2.926784000 | 0.386184000  |
| C | 0.495230000  | 1.153211000  | 0.361057000  |
| C | 1.177711000  | 1.762843000  | 1.426424000  |
| C | 1.638171000  | 3.079287000  | 1.322759000  |
| C | 1.449370000  | 3.794621000  | 0.138753000  |
| C | 0.794188000  | 3.189193000  | -0.941666000 |
| C | 0.319547000  | 1.883599000  | -0.830565000 |
| H | -2.520706000 | -4.024087000 | 0.108917000  |
| H | -4.637168000 | -2.769267000 | -0.302797000 |
| H | -1.792167000 | 1.957633000  | 0.467339000  |
| H | -3.923018000 | 3.071702000  | 0.145837000  |
| H | -5.996190000 | 1.762220000  | -0.384634000 |
| H | -5.852841000 | -0.724639000 | -0.501464000 |
| H | 0.575700000  | -0.779693000 | 1.310044000  |
| H | 1.342019000  | 1.201257000  | 2.349621000  |
| H | 2.155931000  | 3.540695000  | 2.167120000  |
| H | 1.816351000  | 4.820333000  | 0.051926000  |
| H | 0.647951000  | 3.742847000  | -1.872524000 |
| H | -0.212538000 | 1.428642000  | -1.670120000 |
| N | 1.200076000  | -1.179615000 | -0.771809000 |
| C | 2.577642000  | -1.067850000 | -0.539830000 |
| C | 3.397370000  | -0.214798000 | -1.294773000 |
| C | 4.752338000  | -0.133904000 | -0.969347000 |
| N | 5.320869000  | -0.813278000 | 0.030708000  |
| C | 4.532910000  | -1.620125000 | 0.747676000  |
| C | 3.167434000  | -1.789975000 | 0.512109000  |
| H | 5.013692000  | -2.177249000 | 1.560601000  |
| H | 5.409874000  | 0.522265000  | -1.552127000 |
| H | 2.987767000  | 0.373821000  | -2.118990000 |
| H | 2.569806000  | -2.479897000 | 1.111738000  |
| H | 0.742912000  | -2.105027000 | -0.422167000 |
| H | 0.894630000  | -0.871215000 | -1.692629000 |

### [P]

|   |              |             |             |
|---|--------------|-------------|-------------|
| C | -0.029815000 | 2.534666000 | 2.248230000 |
| C | -0.030858000 | 1.133821000 | 2.002566000 |

|   |              |              |              |
|---|--------------|--------------|--------------|
| C | 0.296406000  | 0.612170000  | 0.752788000  |
| C | 0.708096000  | 1.524816000  | -0.283504000 |
| C | 0.699322000  | 2.939594000  | -0.032957000 |
| C | 0.312667000  | 3.411537000  | 1.253609000  |
| C | 1.145597000  | 1.095759000  | -1.571429000 |
| C | 1.518347000  | 1.998780000  | -2.548146000 |
| C | 1.479034000  | 3.390028000  | -2.300048000 |
| C | 1.081786000  | 3.844000000  | -1.060072000 |
| C | 0.136324000  | -0.887829000 | 0.477462000  |
| O | -0.402034000 | 0.383171000  | 3.079048000  |
| C | 1.447116000  | -1.656951000 | 0.253113000  |
| C | 2.673750000  | -1.146746000 | 0.703696000  |
| C | 3.850746000  | -1.887744000 | 0.563263000  |
| C | 3.821914000  | -3.151671000 | -0.031711000 |
| C | 2.604365000  | -3.671402000 | -0.479941000 |
| C | 1.426853000  | -2.932577000 | -0.335194000 |
| H | -0.315235000 | 2.873783000  | 3.245714000  |
| H | 0.303098000  | 4.488300000  | 1.441840000  |
| H | 1.227869000  | 0.031944000  | -1.791596000 |
| H | 1.855607000  | 1.631179000  | -3.520795000 |
| H | 1.771302000  | 4.095065000  | -3.081831000 |
| H | 1.058532000  | 4.915763000  | -0.844034000 |
| N | -0.824176000 | -1.189549000 | -0.575840000 |
| H | 2.711384000  | -0.156067000 | 1.161147000  |
| H | 4.796483000  | -1.469304000 | 0.917072000  |
| H | 4.743018000  | -3.728800000 | -0.145221000 |
| H | 2.567441000  | -4.661590000 | -0.941631000 |
| H | 0.478191000  | -3.352524000 | -0.675814000 |
| C | -2.190595000 | -1.049477000 | -0.472450000 |
| C | -2.862847000 | -0.740416000 | 0.728574000  |
| C | -4.258128000 | -0.677529000 | 0.722998000  |
| N | -5.026862000 | -0.879077000 | -0.348839000 |
| C | -4.385764000 | -1.156910000 | -1.490956000 |
| C | -3.003779000 | -1.251856000 | -1.611056000 |
| H | -2.327307000 | -0.527826000 | 1.653084000  |
| H | -4.778599000 | -0.438448000 | 1.658956000  |
| H | -5.012531000 | -1.317297000 | -2.377060000 |
| H | -2.551253000 | -1.487305000 | -2.578619000 |
| H | -0.458948000 | -1.224736000 | -1.519085000 |
| H | -0.238111000 | -0.554851000 | 2.922512000  |
| H | -0.300627000 | -1.346641000 | 1.382707000  |

### IM[Cata<sub>Cu</sub>-R1]

|   |              |              |              |
|---|--------------|--------------|--------------|
| C | 0.669938000  | 2.446900000  | -1.993704000 |
| C | 0.904285000  | 1.311067000  | -1.103260000 |
| C | 2.309895000  | 1.105942000  | -0.625795000 |
| C | 3.268089000  | 2.221610000  | -0.776745000 |
| C | 2.937841000  | 3.318245000  | -1.622607000 |
| C | 1.633843000  | 3.362941000  | -2.252154000 |
| C | 4.468265000  | 2.304076000  | -0.042796000 |
| C | 5.341578000  | 3.378483000  | -0.197128000 |
| C | 5.042811000  | 4.418709000  | -1.088270000 |
| C | 3.840097000  | 4.388703000  | -1.784062000 |
| C | 2.569781000  | -0.149882000 | -0.133760000 |
| O | -0.025245000 | 0.528455000  | -0.854937000 |

|    |              |              |              |
|----|--------------|--------------|--------------|
| C  | 3.821989000  | -0.874714000 | 0.090101000  |
| C  | 3.865646000  | -1.845873000 | 1.116041000  |
| C  | 5.026881000  | -2.593590000 | 1.325505000  |
| C  | 6.139256000  | -2.424624000 | 0.496504000  |
| C  | 6.090828000  | -1.495380000 | -0.551695000 |
| C  | 4.949248000  | -0.723546000 | -0.749771000 |
| H  | -0.330718000 | 2.522944000  | -2.424216000 |
| H  | 1.421047000  | 4.206264000  | -2.916946000 |
| H  | 4.715957000  | 1.521327000  | 0.672726000  |
| H  | 6.262381000  | 3.409262000  | 0.390759000  |
| H  | 5.733833000  | 5.255481000  | -1.214438000 |
| H  | 3.567874000  | 5.211916000  | -2.450477000 |
| H  | 1.671298000  | -0.738996000 | 0.084425000  |
| H  | 2.994811000  | -1.998486000 | 1.764336000  |
| H  | 5.053016000  | -3.323627000 | 2.138416000  |
| H  | 7.040232000  | -3.023359000 | 0.655098000  |
| H  | 6.947971000  | -1.377214000 | -1.219737000 |
| H  | 4.915484000  | -0.011469000 | -1.576186000 |
| C  | -3.450551000 | 1.670793000  | 0.362801000  |
| N  | -2.968958000 | 0.504099000  | -0.062512000 |
| C  | -3.469826000 | -0.114858000 | -1.148916000 |
| C  | -4.518907000 | 0.462949000  | -1.874032000 |
| C  | -5.041858000 | 1.686105000  | -1.454953000 |
| C  | -4.504339000 | 2.296682000  | -0.319524000 |
| C  | -2.840108000 | -1.418879000 | -1.480033000 |
| N  | -1.852368000 | -1.808134000 | -0.651524000 |
| C  | -1.209396000 | -2.960004000 | -0.824401000 |
| C  | -1.540099000 | -3.816143000 | -1.882216000 |
| C  | -2.560004000 | -3.443631000 | -2.761911000 |
| C  | -3.217176000 | -2.231470000 | -2.557617000 |
| Cl | -5.120655000 | 3.811853000  | 0.248081000  |
| Cl | -0.688598000 | -5.311308000 | -2.085435000 |
| Cu | -1.282337000 | -0.417247000 | 0.797445000  |
| O  | -1.145991000 | 0.963474000  | 2.102878000  |
| O  | -0.043354000 | -1.643231000 | 1.597726000  |
| C  | 0.323860000  | -1.704888000 | 2.845232000  |
| C  | -0.645132000 | -1.356302000 | 3.951216000  |
| O  | 1.420878000  | -2.125052000 | 3.196679000  |
| C  | -1.746403000 | 0.878554000  | 3.258378000  |
| O  | -2.539604000 | 1.726969000  | 3.655409000  |
| C  | -1.461486000 | -0.303968000 | 4.142089000  |
| H  | -2.994998000 | 2.093267000  | 1.267289000  |
| H  | -4.931614000 | -0.027035000 | -2.756178000 |
| H  | -5.859941000 | 2.162544000  | -1.998164000 |
| H  | -0.420409000 | -3.184934000 | -0.100152000 |
| H  | -2.832108000 | -4.096716000 | -3.592969000 |
| H  | -4.015344000 | -1.930608000 | -3.236563000 |
| H  | -0.558811000 | -2.072176000 | 4.776754000  |
| H  | -2.012157000 | -0.248216000 | 5.086455000  |

#### IM[Cata<sub>Cu</sub>-R1-R2]

|   |              |             |              |
|---|--------------|-------------|--------------|
| C | -1.534855000 | 0.055100000 | -2.529795000 |
| C | -0.823384000 | 0.572513000 | -1.364567000 |
| C | -1.212707000 | 1.936719000 | -0.895390000 |

|    |              |              |              |
|----|--------------|--------------|--------------|
| C  | -2.531198000 | 2.457726000  | -1.307001000 |
| C  | -3.210031000 | 1.848370000  | -2.400108000 |
| C  | -2.636633000 | 0.674194000  | -3.023240000 |
| C  | -3.202555000 | 3.479583000  | -0.608308000 |
| C  | -4.453744000 | 3.935412000  | -1.017781000 |
| C  | -5.082619000 | 3.381486000  | -2.142116000 |
| C  | -4.464407000 | 2.336497000  | -2.818143000 |
| C  | -0.245418000 | 2.586427000  | -0.169347000 |
| O  | 0.101333000  | -0.091692000 | -0.858645000 |
| C  | -0.048024000 | 3.986705000  | 0.204113000  |
| C  | 0.728873000  | 4.258305000  | 1.353983000  |
| C  | 0.989355000  | 5.574580000  | 1.737940000  |
| C  | 0.524519000  | 6.640567000  | 0.962714000  |
| C  | -0.205214000 | 6.384511000  | -0.205858000 |
| C  | -0.494616000 | 5.074958000  | -0.579332000 |
| H  | -1.145891000 | -0.867806000 | -2.965531000 |
| H  | -3.158201000 | 0.252847000  | -3.888683000 |
| H  | -2.746399000 | 3.910511000  | 0.282160000  |
| H  | -4.949165000 | 4.725721000  | -0.448357000 |
| H  | -6.058964000 | 3.748848000  | -2.466569000 |
| H  | -4.958270000 | 1.862544000  | -3.670944000 |
| H  | 0.579840000  | 1.938963000  | 0.141204000  |
| H  | 1.123956000  | 3.426323000  | 1.944526000  |
| H  | 1.576467000  | 5.766396000  | 2.639379000  |
| H  | 0.744176000  | 7.670532000  | 1.255734000  |
| H  | -0.543816000 | 7.213463000  | -0.832561000 |
| H  | -1.047083000 | 4.888321000  | -1.501153000 |
| N  | 3.030334000  | 0.591192000  | -0.049150000 |
| C  | 4.101677000  | 1.015629000  | -0.779156000 |
| C  | 4.183565000  | 0.816322000  | -2.177367000 |
| C  | 5.320650000  | 1.235911000  | -2.862465000 |
| N  | 6.374954000  | 1.830934000  | -2.292907000 |
| C  | 6.295514000  | 2.023745000  | -0.969960000 |
| C  | 5.214283000  | 1.649052000  | -0.177699000 |
| H  | 7.156261000  | 2.515718000  | -0.498554000 |
| H  | 5.377953000  | 1.079533000  | -3.947895000 |
| H  | 3.358856000  | 0.338891000  | -2.714353000 |
| H  | 5.221133000  | 1.841535000  | 0.898232000  |
| H  | 2.883595000  | 0.913298000  | 0.911528000  |
| H  | 2.178871000  | 0.313514000  | -0.528982000 |
| C  | -2.832297000 | -2.609165000 | 0.324412000  |
| N  | -1.508453000 | -2.737793000 | 0.240361000  |
| C  | -0.934465000 | -3.756282000 | -0.430824000 |
| C  | -1.727920000 | -4.712424000 | -1.076569000 |
| C  | -3.116381000 | -4.600824000 | -1.011080000 |
| C  | -3.677808000 | -3.537984000 | -0.298507000 |
| C  | 0.549716000  | -3.770891000 | -0.403158000 |
| N  | 1.119983000  | -2.789321000 | 0.325253000  |
| C  | 2.442131000  | -2.685937000 | 0.443719000  |
| C  | 3.292694000  | -3.604327000 | -0.188205000 |
| C  | 2.734470000  | -4.633114000 | -0.950446000 |
| C  | 1.346413000  | -4.716857000 | -1.058595000 |
| Cl | -5.395266000 | -3.358252000 | -0.179328000 |
| Cl | 5.005964000  | -3.447757000 | -0.018540000 |
| Cu | -0.178162000 | -1.385661000 | 1.117532000  |

|   |              |              |              |
|---|--------------|--------------|--------------|
| O | -1.620544000 | -0.280933000 | 1.674190000  |
| O | 1.187457000  | -0.649640000 | 2.240720000  |
| C | 1.116665000  | 0.499429000  | 2.831063000  |
| C | 0.102676000  | 0.707904000  | 3.925178000  |
| O | 1.901989000  | 1.423792000  | 2.598095000  |
| C | -2.107439000 | -0.108194000 | 2.875995000  |
| O | -3.274853000 | -0.355821000 | 3.152190000  |
| C | -1.219250000 | 0.463602000  | 3.945532000  |
| H | -3.203698000 | -1.757889000 | 0.908076000  |
| H | -1.277736000 | -5.542215000 | -1.621928000 |
| H | -3.761279000 | -5.331909000 | -1.501920000 |
| H | 2.815498000  | -1.846097000 | 1.035240000  |
| H | 3.380997000  | -5.354987000 | -1.452542000 |
| H | 0.898583000  | -5.514078000 | -1.652254000 |
| H | 0.543120000  | 1.191318000  | 4.804834000  |
| H | -1.778169000 | 0.716823000  | 4.851586000  |

### TS[Cata<sub>Cu</sub> -R1-R2]

|   |              |              |              |
|---|--------------|--------------|--------------|
| C | 0.712307000  | -2.257729000 | -1.795464000 |
| C | -0.151403000 | -1.356919000 | -1.078102000 |
| C | -1.475468000 | -1.799904000 | -0.722323000 |
| C | -1.858815000 | -3.183273000 | -0.974943000 |
| C | -0.959461000 | -4.030936000 | -1.707959000 |
| C | 0.312287000  | -3.521223000 | -2.117049000 |
| C | -3.030141000 | -3.806316000 | -0.459962000 |
| C | -3.333140000 | -5.131727000 | -0.724073000 |
| C | -2.478430000 | -5.930256000 | -1.510142000 |
| C | -1.300849000 | -5.380114000 | -1.977448000 |
| C | -2.285691000 | -0.777800000 | -0.077543000 |
| O | 0.242609000  | -0.143932000 | -0.857573000 |
| C | -3.735343000 | -0.808436000 | 0.212115000  |
| C | -4.172674000 | -0.374667000 | 1.477455000  |
| C | -5.537986000 | -0.362704000 | 1.783123000  |
| C | -6.478367000 | -0.742169000 | 0.823783000  |
| C | -6.053412000 | -1.135771000 | -0.453194000 |
| C | -4.694883000 | -1.170935000 | -0.755537000 |
| H | 1.689842000  | -1.873131000 | -2.092850000 |
| H | 0.977888000  | -4.183163000 | -2.679468000 |
| H | -3.699834000 | -3.247466000 | 0.187004000  |
| H | -4.243412000 | -5.563796000 | -0.299646000 |
| H | -2.729013000 | -6.973119000 | -1.718271000 |
| H | -0.594693000 | -5.988380000 | -2.550028000 |
| H | -1.726161000 | -0.187806000 | 0.654247000  |
| H | -3.436477000 | -0.039022000 | 2.213140000  |
| H | -5.864336000 | -0.037475000 | 2.773918000  |
| H | -7.545138000 | -0.720915000 | 1.061523000  |
| H | -6.787581000 | -1.419140000 | -1.211644000 |
| H | -4.369278000 | -1.494729000 | -1.747277000 |
| N | -2.155127000 | 0.751108000  | -1.359920000 |
| C | -2.843460000 | 1.940675000  | -1.066358000 |
| C | -3.892818000 | 2.389834000  | -1.882968000 |
| C | -4.549069000 | 3.572186000  | -1.536749000 |
| N | -4.245912000 | 4.301760000  | -0.460491000 |
| C | -3.259422000 | 3.852398000  | 0.322609000  |
| C | -2.525885000 | 2.689543000  | 0.077719000  |

|    |              |              |              |
|----|--------------|--------------|--------------|
| H  | -3.032597000 | 4.449078000  | 1.213811000  |
| H  | -5.364213000 | 3.943789000  | -2.169536000 |
| H  | -4.187166000 | 1.835172000  | -2.777936000 |
| H  | -1.755938000 | 2.354835000  | 0.777893000  |
| H  | -1.109784000 | 0.725949000  | -1.212285000 |
| H  | -2.399776000 | 0.344052000  | -2.261064000 |
| C  | 3.856506000  | -1.422275000 | 0.268393000  |
| N  | 3.338364000  | -0.218693000 | 0.025275000  |
| C  | 3.896952000  | 0.625616000  | -0.864367000 |
| C  | 5.039540000  | 0.248933000  | -1.580416000 |
| C  | 5.599851000  | -1.007951000 | -1.353377000 |
| C  | 5.006173000  | -1.851689000 | -0.411837000 |
| C  | 3.229937000  | 1.946768000  | -0.985080000 |
| N  | 2.160174000  | 2.127984000  | -0.186474000 |
| C  | 1.494050000  | 3.279974000  | -0.167020000 |
| C  | 1.876763000  | 4.349025000  | -0.986580000 |
| C  | 2.975001000  | 4.190862000  | -1.836267000 |
| C  | 3.659675000  | 2.976897000  | -1.832747000 |
| Cl | 5.670955000  | -3.415337000 | -0.080638000 |
| Cl | 0.991984000  | 5.837247000  | -0.937098000 |
| Cu | 1.520119000  | 0.445359000  | 0.864304000  |
| O  | 1.337169000  | -1.175038000 | 1.856867000  |
| O  | 0.211489000  | 1.462372000  | 1.863669000  |
| C  | -0.418931000 | 0.996882000  | 2.902350000  |
| C  | 0.375446000  | 0.502460000  | 4.086879000  |
| O  | -1.641486000 | 1.021231000  | 3.011571000  |
| C  | 1.830420000  | -1.333891000 | 3.056414000  |
| O  | 2.703059000  | -2.158707000 | 3.311695000  |
| C  | 1.293469000  | -0.475893000 | 4.165466000  |
| H  | 3.356306000  | -2.032375000 | 1.031482000  |
| H  | 5.498634000  | 0.920954000  | -2.305924000 |
| H  | 6.491283000  | -1.331138000 | -1.893923000 |
| H  | 0.646000000  | 3.337308000  | 0.520662000  |
| H  | 3.287716000  | 5.010261000  | -2.485843000 |
| H  | 4.522476000  | 2.842970000  | -2.485332000 |
| H  | 0.062100000  | 0.985217000  | 5.020139000  |
| H  | 1.718161000  | -0.725171000 | 5.142523000  |

**[Cata<sub>Cu</sub>-P]**

|   |              |              |              |
|---|--------------|--------------|--------------|
| C | 0.326050000  | -2.515027000 | -1.658194000 |
| C | -0.450788000 | -1.441125000 | -1.161610000 |
| C | -1.811470000 | -1.570274000 | -0.848109000 |
| C | -2.398293000 | -2.890136000 | -0.966557000 |
| C | -1.597765000 | -3.973109000 | -1.490914000 |
| C | -0.238619000 | -3.748743000 | -1.833150000 |
| C | -3.725671000 | -3.236487000 | -0.564731000 |
| C | -4.229435000 | -4.513989000 | -0.708849000 |
| C | -3.448036000 | -5.550212000 | -1.266426000 |
| C | -2.152684000 | -5.274229000 | -1.640720000 |
| C | -2.503539000 | -0.289766000 | -0.311387000 |
| O | 0.223983000  | -0.258546000 | -1.010981000 |
| C | -4.008225000 | -0.271550000 | -0.062800000 |
| C | -4.489078000 | -0.254161000 | 1.254958000  |
| C | -5.864847000 | -0.205427000 | 1.505958000  |



|    |              |              |              |
|----|--------------|--------------|--------------|
| C  | -6.773960000 | -0.157833000 | 0.446290000  |
| C  | -6.300554000 | -0.150982000 | -0.870949000 |
| C  | -4.928616000 | -0.202673000 | -1.121213000 |
| H  | 1.372836000  | -2.319694000 | -1.895316000 |
| H  | 0.353637000  | -4.580506000 | -2.223108000 |
| H  | -4.365525000 | -2.491238000 | -0.109499000 |
| H  | -5.249822000 | -4.721653000 | -0.376119000 |
| H  | -3.860782000 | -6.555508000 | -1.380810000 |
| H  | -1.513615000 | -6.061088000 | -2.051149000 |
| H  | -2.026779000 | -0.073594000 | 0.657236000  |
| H  | -3.775819000 | -0.271565000 | 2.083132000  |
| H  | -6.224801000 | -0.195140000 | 2.538014000  |
| H  | -7.848398000 | -0.116926000 | 0.643195000  |
| H  | -7.004472000 | -0.107727000 | -1.706198000 |
| H  | -4.577106000 | -0.210319000 | -2.157070000 |
| N  | -2.124179000 | 0.840132000  | -1.214603000 |
| C  | -2.413015000 | 2.176679000  | -0.887944000 |
| C  | -2.617353000 | 3.116055000  | -1.914928000 |
| C  | -2.833071000 | 4.452395000  | -1.580154000 |
| N  | -2.867308000 | 4.910946000  | -0.326351000 |
| C  | -2.679232000 | 4.010711000  | 0.644261000  |
| C  | -2.449573000 | 2.648364000  | 0.436240000  |
| H  | -2.711174000 | 4.390040000  | 1.672796000  |
| H  | -2.992728000 | 5.188522000  | -2.378016000 |
| H  | -2.610626000 | 2.806397000  | -2.964285000 |
| H  | -2.287142000 | 1.984353000  | 1.288396000  |
| H  | -0.471055000 | 0.454007000  | -1.049975000 |
| H  | -2.346112000 | 0.629866000  | -2.186117000 |
| C  | 4.061772000  | -1.545231000 | -0.063866000 |
| N  | 3.491850000  | -0.341252000 | -0.113690000 |
| C  | 4.034525000  | 0.671596000  | -0.818332000 |
| C  | 5.218146000  | 0.477190000  | -1.540478000 |
| C  | 5.832438000  | -0.774469000 | -1.514927000 |
| C  | 5.251187000  | -1.798436000 | -0.762562000 |
| C  | 3.300577000  | 1.959454000  | -0.736328000 |
| N  | 2.196444000  | 1.944042000  | 0.038033000  |
| C  | 1.456985000  | 3.036782000  | 0.218886000  |
| C  | 1.799381000  | 4.248995000  | -0.395962000 |
| C  | 2.935477000  | 4.296872000  | -1.208925000 |
| C  | 3.694009000  | 3.139720000  | -1.379689000 |
| Cl | 5.978863000  | -3.366433000 | -0.686934000 |
| Cl | 0.820106000  | 5.650882000  | -0.145405000 |
| Cu | 1.691622000  | 0.098804000  | 0.858764000  |
| O  | 1.565512000  | -1.682504000 | 1.498604000  |
| O  | 0.299978000  | 0.871678000  | 1.920393000  |
| C  | -0.417978000 | 0.286568000  | 2.830527000  |
| C  | 0.246131000  | -0.510468000 | 3.924362000  |
| O  | -1.638917000 | 0.424096000  | 2.901005000  |
| C  | 1.893400000  | -2.076065000 | 2.701918000  |
| O  | 2.752767000  | -2.926230000 | 2.903267000  |
| C  | 1.173909000  | -1.482968000 | 3.879989000  |
| H  | 3.561482000  | -2.297871000 | 0.558360000  |
| H  | 5.666009000  | 1.286956000  | -2.116896000 |
| H  | 6.756197000  | -0.957254000 | -2.066744000 |
| H  | 0.581007000  | 2.927437000  | 0.865064000  |

|   |              |              |              |
|---|--------------|--------------|--------------|
| H | 3.218783000  | 5.230608000  | -1.697989000 |
| H | 4.583971000  | 3.166138000  | -2.008810000 |
| H | -0.192798000 | -0.280977000 | 4.902109000  |
| H | 1.467991000  | -1.957368000 | 4.821264000  |

### IM[Cata<sub>Mn</sub>-R1]

|    |              |              |              |
|----|--------------|--------------|--------------|
| C  | -0.329258000 | -2.518320000 | -1.182881000 |
| C  | -0.848332000 | -1.243103000 | -0.747588000 |
| C  | -2.320182000 | -1.067573000 | -0.618600000 |
| C  | -3.187329000 | -2.235379000 | -0.884921000 |
| C  | -2.599079000 | -3.442092000 | -1.369129000 |
| C  | -1.165129000 | -3.535616000 | -1.516326000 |
| C  | -4.567549000 | -2.263682000 | -0.596507000 |
| C  | -5.344197000 | -3.392349000 | -0.846321000 |
| C  | -4.769341000 | -4.549912000 | -1.389409000 |
| C  | -3.402774000 | -4.571234000 | -1.632728000 |
| C  | -2.692608000 | 0.190570000  | -0.194159000 |
| O  | -0.065834000 | -0.276058000 | -0.549963000 |
| C  | -3.957182000 | 0.919010000  | -0.147761000 |
| C  | -4.148364000 | 1.834595000  | 0.913606000  |
| C  | -5.310756000 | 2.603650000  | 0.978569000  |
| C  | -6.275308000 | 2.513221000  | -0.030451000 |
| C  | -6.075381000 | 1.643427000  | -1.110519000 |
| C  | -4.933455000 | 0.847547000  | -1.166995000 |
| H  | 0.754175000  | -2.614246000 | -1.262850000 |
| H  | -0.752581000 | -4.482086000 | -1.878477000 |
| H  | -5.044757000 | -1.394672000 | -0.149908000 |
| H  | -6.410251000 | -3.371159000 | -0.606454000 |
| H  | -5.382423000 | -5.430802000 | -1.593573000 |
| H  | -2.924675000 | -5.477792000 | -2.013665000 |
| H  | -1.846995000 | 0.784335000  | 0.166793000  |
| H  | -3.378706000 | 1.909069000  | 1.688466000  |
| H  | -5.457438000 | 3.289150000  | 1.816989000  |
| H  | -7.177453000 | 3.128941000  | 0.015206000  |
| H  | -6.813633000 | 1.590469000  | -1.914836000 |
| H  | -4.776811000 | 0.184104000  | -2.019839000 |
| C  | 3.576825000  | -1.537491000 | -0.028553000 |
| N  | 3.020407000  | -0.327525000 | -0.234936000 |
| C  | 3.564578000  | 0.534181000  | -1.140623000 |
| C  | 4.697979000  | 0.168222000  | -1.884310000 |
| C  | 5.273760000  | -1.080119000 | -1.691756000 |
| C  | 4.702144000  | -1.942401000 | -0.741243000 |
| C  | 2.883234000  | 1.822866000  | -1.216708000 |
| N  | 1.837202000  | 1.946388000  | -0.350268000 |
| C  | 1.137074000  | 3.095403000  | -0.298247000 |
| C  | 1.452213000  | 4.173332000  | -1.118053000 |
| C  | 2.521334000  | 4.071001000  | -2.024605000 |
| C  | 3.238802000  | 2.883301000  | -2.065585000 |
| Cl | 5.390384000  | -3.509229000 | -0.452199000 |
| Cl | 0.523357000  | 5.637175000  | -1.014448000 |

|    |              |              |              |
|----|--------------|--------------|--------------|
| Mn | 1.353205000  | 0.322700000  | 0.729340000  |
| O  | 1.274282000  | -1.258856000 | 1.763017000  |
| O  | 0.290489000  | 1.381436000  | 1.901840000  |
| C  | -0.466965000 | 1.054291000  | 2.918091000  |
| C  | 0.141969000  | 0.314804000  | 4.079355000  |
| O  | -1.640683000 | 1.385434000  | 3.011126000  |
| C  | 1.605633000  | -1.527833000 | 3.004522000  |
| O  | 2.399477000  | -2.412345000 | 3.291135000  |
| C  | 0.968639000  | -0.745519000 | 4.117090000  |
| H  | 3.107069000  | -2.161840000 | 0.738317000  |
| H  | 5.130621000  | 0.860118000  | -2.607713000 |
| H  | 6.155066000  | -1.390575000 | -2.255011000 |
| H  | 0.323456000  | 3.124484000  | 0.430105000  |
| H  | 2.774387000  | 4.909864000  | -2.674380000 |
| H  | 4.075517000  | 2.778141000  | -2.757018000 |
| H  | -0.247822000 | 0.681809000  | 5.035390000  |
| H  | 1.238426000  | -1.149631000 | 5.097613000  |

**IM[Cata<sub>Mn</sub>-R1-R2]**

|   |              |              |              |
|---|--------------|--------------|--------------|
| C | 0.522995000  | -2.278417000 | 1.560503000  |
| C | 0.982610000  | -1.172208000 | 0.765657000  |
| C | 2.436188000  | -0.907393000 | 0.657055000  |
| C | 3.364077000  | -1.796115000 | 1.388524000  |
| C | 2.826440000  | -2.827483000 | 2.216513000  |
| C | 1.400134000  | -3.030812000 | 2.278034000  |
| C | 4.766517000  | -1.754742000 | 1.242495000  |
| C | 5.599748000  | -2.631053000 | 1.932441000  |
| C | 5.064348000  | -3.597947000 | 2.795505000  |
| C | 3.686149000  | -3.698090000 | 2.920363000  |
| C | 2.754867000  | 0.120389000  | -0.210960000 |
| O | 0.142317000  | -0.385582000 | 0.224281000  |
| C | 3.959089000  | 0.910420000  | -0.446327000 |
| C | 4.222601000  | 1.337239000  | -1.769392000 |
| C | 5.324688000  | 2.148895000  | -2.039580000 |
| C | 6.151204000  | 2.587781000  | -0.999609000 |
| C | 5.874105000  | 2.208058000  | 0.320455000  |
| C | 4.795311000  | 1.371041000  | 0.596610000  |
| H | -0.550915000 | -2.460956000 | 1.595639000  |
| H | 1.028333000  | -3.841660000 | 2.911194000  |
| H | 5.220062000  | -1.037436000 | 0.563260000  |
| H | 6.681113000  | -2.563934000 | 1.789317000  |
| H | 5.721316000  | -4.278005000 | 3.342590000  |
| H | 3.244227000  | -4.471356000 | 3.554399000  |
| H | 1.918922000  | 0.417233000  | -0.852215000 |
| H | 3.560413000  | 0.996088000  | -2.571445000 |
| H | 5.532559000  | 2.451022000  | -3.069046000 |
| H | 7.005134000  | 3.235956000  | -1.213163000 |
| H | 6.502499000  | 2.570403000  | 1.138012000  |
| H | 4.576877000  | 1.089321000  | 1.628866000  |
| N | 0.296348000  | 2.446926000  | 1.244075000  |

|    |              |              |              |
|----|--------------|--------------|--------------|
| C  | -0.355448000 | 2.655187000  | 2.427935000  |
| C  | -1.231331000 | 1.685522000  | 2.968252000  |
| C  | -1.903394000 | 1.964403000  | 4.155214000  |
| N  | -1.785817000 | 3.104501000  | 4.846189000  |
| C  | -0.950539000 | 4.017439000  | 4.337947000  |
| C  | -0.222913000 | 3.855006000  | 3.161102000  |
| H  | -0.846908000 | 4.951735000  | 4.904506000  |
| H  | -2.580490000 | 1.209077000  | 4.575090000  |
| H  | -1.369036000 | 0.729237000  | 2.458313000  |
| H  | 0.439954000  | 4.650468000  | 2.808973000  |
| H  | 0.301743000  | 1.514320000  | 0.834014000  |
| H  | 1.052682000  | 3.066584000  | 0.985355000  |
| C  | -3.273399000 | -2.146288000 | 0.065228000  |
| N  | -2.867150000 | -0.917438000 | -0.307238000 |
| C  | -3.606788000 | 0.179070000  | 0.019061000  |
| C  | -4.788386000 | 0.048769000  | 0.764953000  |
| C  | -5.212113000 | -1.210983000 | 1.168121000  |
| C  | -4.440619000 | -2.325858000 | 0.803672000  |
| C  | -3.066181000 | 1.436071000  | -0.495400000 |
| N  | -1.921146000 | 1.290584000  | -1.219666000 |
| C  | -1.334847000 | 2.366929000  | -1.773828000 |
| C  | -1.868331000 | 3.642403000  | -1.621656000 |
| C  | -3.041411000 | 3.821152000  | -0.873030000 |
| C  | -3.641687000 | 2.702119000  | -0.311106000 |
| Cl | -4.928575000 | -3.924140000 | 1.269352000  |
| Cl | -1.069723000 | 5.000743000  | -2.351120000 |
| Mn | -1.148422000 | -0.570785000 | -1.338589000 |
| O  | -0.809398000 | -2.424526000 | -1.494762000 |
| O  | 0.043293000  | -0.020075000 | -2.716635000 |
| C  | 0.910103000  | -0.670972000 | -3.449966000 |
| C  | 0.474664000  | -1.908023000 | -4.189225000 |
| O  | 2.055454000  | -0.280932000 | -3.629707000 |
| C  | -0.919134000 | -3.278194000 | -2.487559000 |
| O  | -1.534603000 | -4.327692000 | -2.378269000 |
| C  | -0.249518000 | -2.971790000 | -3.797182000 |
| H  | -2.647312000 | -2.981990000 | -0.262857000 |
| H  | -5.374365000 | 0.929352000  | 1.029175000  |
| H  | -6.125628000 | -1.341201000 | 1.750203000  |
| H  | -0.427592000 | 2.172426000  | -2.350070000 |
| H  | -3.464336000 | 4.817786000  | -0.739778000 |
| H  | -4.553721000 | 2.813529000  | 0.275590000  |
| H  | 0.923535000  | -1.950172000 | -5.187875000 |
| H  | -0.378373000 | -3.791165000 | -4.510968000 |

**TS[Cata<sub>Mn</sub>-R1-R2]**

|   |              |              |              |
|---|--------------|--------------|--------------|
| C | 0.883932000  | -2.403444000 | -1.220055000 |
| C | -0.083275000 | -1.497970000 | -0.675153000 |
| C | -1.457613000 | -1.906315000 | -0.564710000 |
| C | -1.828382000 | -3.264144000 | -0.951170000 |
| C | -0.825782000 | -4.117993000 | -1.525769000 |

|   |              |              |              |
|---|--------------|--------------|--------------|
| C | 0.516750000  | -3.644779000 | -1.651237000 |
| C | -3.100097000 | -3.856646000 | -0.718497000 |
| C | -3.384413000 | -5.158057000 | -1.098779000 |
| C | -2.411776000 | -5.960987000 | -1.726555000 |
| C | -1.146687000 | -5.441867000 | -1.918815000 |
| C | -2.324753000 | -0.891410000 | 0.009980000  |
| O | 0.270345000  | -0.279213000 | -0.371804000 |
| C | -3.793104000 | -0.903321000 | 0.185061000  |
| C | -4.301618000 | -0.587539000 | 1.459119000  |
| C | -5.682277000 | -0.560980000 | 1.680398000  |
| C | -6.567402000 | -0.804300000 | 0.628300000  |
| C | -6.070561000 | -1.077838000 | -0.653636000 |
| C | -4.696301000 | -1.130764000 | -0.872607000 |
| H | 1.913043000  | -2.055518000 | -1.302120000 |
| H | 1.263589000  | -4.314710000 | -2.087150000 |
| H | -3.873072000 | -3.295999000 | -0.202941000 |
| H | -4.377218000 | -5.566854000 | -0.892783000 |
| H | -2.647298000 | -6.984047000 | -2.028820000 |
| H | -0.357937000 | -6.055357000 | -2.363195000 |
| H | -1.832536000 | -0.328242000 | 0.808637000  |
| H | -3.602234000 | -0.360524000 | 2.267994000  |
| H | -6.064983000 | -0.330562000 | 2.677547000  |
| H | -7.646368000 | -0.769311000 | 0.799343000  |
| H | -6.760950000 | -1.252749000 | -1.482540000 |
| H | -4.315972000 | -1.359406000 | -1.871417000 |
| N | -2.056088000 | 0.683000000  | -1.213151000 |
| C | -2.783118000 | 1.865645000  | -0.967830000 |
| C | -3.673974000 | 2.376344000  | -1.922818000 |
| C | -4.369898000 | 3.549507000  | -1.624174000 |
| N | -4.243132000 | 4.213520000  | -0.473424000 |
| C | -3.407220000 | 3.705525000  | 0.437673000  |
| C | -2.658989000 | 2.539924000  | 0.256451000  |
| H | -3.323199000 | 4.253417000  | 1.383216000  |
| H | -5.063511000 | 3.970362000  | -2.362075000 |
| H | -3.812973000 | 1.880095000  | -2.887185000 |
| H | -2.031870000 | 2.145274000  | 1.061715000  |
| H | -1.047922000 | 0.679306000  | -0.944764000 |
| H | -2.170021000 | 0.318202000  | -2.157884000 |
| C | 4.181624000  | -1.051677000 | -0.022011000 |
| N | 3.431964000  | 0.063325000  | -0.167395000 |
| C | 3.816566000  | 1.035857000  | -1.049142000 |
| C | 4.969949000  | 0.871674000  | -1.836869000 |
| C | 5.734338000  | -0.277610000 | -1.710771000 |
| C | 5.331120000  | -1.250548000 | -0.775760000 |
| C | 2.962961000  | 2.210813000  | -1.033712000 |
| N | 1.951766000  | 2.143776000  | -0.112852000 |
| C | 1.119094000  | 3.195935000  | 0.041972000  |
| C | 1.245439000  | 4.345118000  | -0.724881000 |
| C | 2.267765000  | 4.433326000  | -1.690277000 |
| C | 3.129244000  | 3.356364000  | -1.832153000 |

|    |              |              |              |
|----|--------------|--------------|--------------|
| Cl | 6.264880000  | -2.699967000 | -0.563342000 |
| Cl | 0.139085000  | 5.665403000  | -0.490089000 |
| Mn | 1.734925000  | 0.417608000  | 0.865644000  |
| O  | 1.926194000  | -1.203366000 | 1.826730000  |
| O  | 0.580694000  | 1.225981000  | 2.167729000  |
| C  | -0.259843000 | 0.603199000  | 2.942117000  |
| C  | 0.270374000  | -0.167775000 | 4.115609000  |
| O  | -1.480397000 | 0.663636000  | 2.790038000  |
| C  | 2.209630000  | -1.510911000 | 3.071201000  |
| O  | 3.175347000  | -2.193476000 | 3.376545000  |
| C  | 1.282508000  | -1.051087000 | 4.162317000  |
| H  | 3.837634000  | -1.766002000 | 0.731690000  |
| H  | 5.269910000  | 1.649564000  | -2.540001000 |
| H  | 6.634716000  | -0.429232000 | -2.307760000 |
| H  | 0.353328000  | 3.089438000  | 0.811729000  |
| H  | 2.373524000  | 5.331318000  | -2.300295000 |
| H  | 3.936217000  | 3.399977000  | -2.564525000 |
| H  | -0.326980000 | -0.019784000 | 5.022040000  |
| H  | 1.498256000  | -1.542705000 | 5.115737000  |

**[Cata<sub>Mn</sub>-P]**

|   |              |              |              |
|---|--------------|--------------|--------------|
| C | 0.423583000  | -2.586768000 | -1.429815000 |
| C | -0.351661000 | -1.489204000 | -0.990732000 |
| C | -1.723618000 | -1.578325000 | -0.727855000 |
| C | -2.325413000 | -2.894887000 | -0.803538000 |
| C | -1.528472000 | -4.007704000 | -1.265262000 |
| C | -0.158524000 | -3.815785000 | -1.583145000 |
| C | -3.661843000 | -3.206093000 | -0.404132000 |
| C | -4.178892000 | -4.482672000 | -0.500928000 |
| C | -3.403053000 | -5.549342000 | -1.006747000 |
| C | -2.098616000 | -5.306598000 | -1.372244000 |
| C | -2.429480000 | -0.268428000 | -0.296355000 |
| O | 0.336608000  | -0.300457000 | -0.848495000 |
| C | -3.949619000 | -0.213689000 | -0.207334000 |
| C | -4.559419000 | -0.057135000 | 1.046267000  |
| C | -5.951562000 | 0.038481000  | 1.149345000  |
| C | -6.747314000 | -0.008066000 | 0.002089000  |
| C | -6.144745000 | -0.146509000 | -1.253691000 |
| C | -4.756477000 | -0.245023000 | -1.355978000 |
| H | 1.479696000  | -2.419504000 | -1.642522000 |
| H | 0.430133000  | -4.668432000 | -1.930468000 |
| H | -4.296026000 | -2.435292000 | 0.016229000  |
| H | -5.204612000 | -4.665857000 | -0.170566000 |
| H | -3.827246000 | -6.553226000 | -1.085713000 |
| H | -1.463951000 | -6.118380000 | -1.738074000 |
| H | -2.047530000 | -0.026760000 | 0.707104000  |
| H | -3.933161000 | -0.014769000 | 1.941423000  |
| H | -6.413735000 | 0.157552000  | 2.132660000  |
| H | -7.834619000 | 0.069136000  | 0.082815000  |
| H | -6.760644000 | -0.181932000 | -2.156056000 |

|    |              |              |              |
|----|--------------|--------------|--------------|
| H  | -4.302605000 | -0.371405000 | -2.343463000 |
| N  | -1.940179000 | 0.827841000  | -1.196144000 |
| C  | -2.262265000 | 2.177261000  | -0.926876000 |
| C  | -2.454647000 | 3.072468000  | -1.992066000 |
| C  | -2.714172000 | 4.414140000  | -1.710781000 |
| N  | -2.800522000 | 4.911770000  | -0.475188000 |
| C  | -2.618787000 | 4.052692000  | 0.532322000  |
| C  | -2.348528000 | 2.690397000  | 0.377777000  |
| H  | -2.690409000 | 4.467373000  | 1.544878000  |
| H  | -2.866987000 | 5.118854000  | -2.537541000 |
| H  | -2.408177000 | 2.727352000  | -3.029122000 |
| H  | -2.197663000 | 2.057573000  | 1.255661000  |
| H  | -0.358365000 | 0.421722000  | -0.970308000 |
| H  | -2.123870000 | 0.596585000  | -2.172003000 |
| C  | 3.985694000  | -1.540068000 | -0.204800000 |
| N  | 3.415223000  | -0.319282000 | -0.173251000 |
| C  | 3.981626000  | 0.719363000  | -0.849609000 |
| C  | 5.152725000  | 0.531010000  | -1.601080000 |
| C  | 5.743161000  | -0.724300000 | -1.653012000 |
| C  | 5.147338000  | -1.774355000 | -0.935373000 |
| C  | 3.281032000  | 1.988673000  | -0.680742000 |
| N  | 2.179492000  | 1.913003000  | 0.122937000  |
| C  | 1.465030000  | 3.025957000  | 0.384786000  |
| C  | 1.819413000  | 4.262321000  | -0.146137000 |
| C  | 2.944846000  | 4.362998000  | -0.980960000 |
| C  | 3.675939000  | 3.212579000  | -1.243334000 |
| Cl | 5.848333000  | -3.361096000 | -0.954600000 |
| Cl | 0.871725000  | 5.665146000  | 0.225818000  |
| Mn | 1.711539000  | 0.091911000  | 0.838094000  |
| O  | 1.658098000  | -1.659786000 | 1.531771000  |
| O  | 0.364105000  | 0.806236000  | 1.981499000  |
| C  | -0.434850000 | 0.246764000  | 2.846747000  |
| C  | 0.129814000  | -0.628700000 | 3.930311000  |
| O  | -1.645343000 | 0.457506000  | 2.861011000  |
| C  | 1.808707000  | -2.190765000 | 2.723332000  |
| O  | 2.548703000  | -3.139759000 | 2.927596000  |
| C  | 1.029402000  | -1.627279000 | 3.879238000  |
| H  | 3.492531000  | -2.315904000 | 0.388730000  |
| H  | 5.602000000  | 1.364659000  | -2.141603000 |
| H  | 6.652580000  | -0.899302000 | -2.229728000 |
| H  | 0.599548000  | 2.897743000  | 1.037788000  |
| H  | 3.230706000  | 5.326622000  | -1.404928000 |
| H  | 4.557154000  | 3.264381000  | -1.883460000 |
| H  | -0.372139000 | -0.452852000 | 4.888263000  |
| H  | 1.234346000  | -2.176246000 | 4.803322000  |

**Table S1.** The calculated values of Zero-point Energies of all structure studied in this work at the B3LYP/SVP level of theory (in kcal/mol).

| Structure                                         | Without catalyst | With catalyst |              |
|---------------------------------------------------|------------------|---------------|--------------|
|                                                   |                  | Cu            | Mn           |
| R1                                                | -729.483681      | -             | -            |
| R2                                                | -303.322191      | -             | -            |
| Cata                                              | -                | -3508.341059  | -3018.857286 |
| Pre-TS                                            | -1032.817699     | -             | -            |
| TS                                                | -1032.786159     | -             | -            |
| P                                                 | -1032.823644     | -             | -            |
| IM[Cata-R1]                                       | -                | -4237.847208  | -3748.410276 |
| IM[Cata-R-                                        | -                | -4541.184584  | -4051.740839 |
| $\tilde{\text{T}}\tilde{\text{S}}[\text{Cata-R-}$ | -                | -4541.154634  | -4051.720544 |
| $\tilde{\text{C}}[\text{Cata-P}]$                 | -                | -4541.184108  | -4051.742045 |
